# Supplementary material
Source: PubMed Central journal article supplement (PMC5038279)

1 **Figure S1.** Root mean square deviation (RMSD) of the secondary structure  $\alpha$  carbons  
2 (excluding residues 113-115) of OXA-66 (blue) and OXA-109 (green).

3

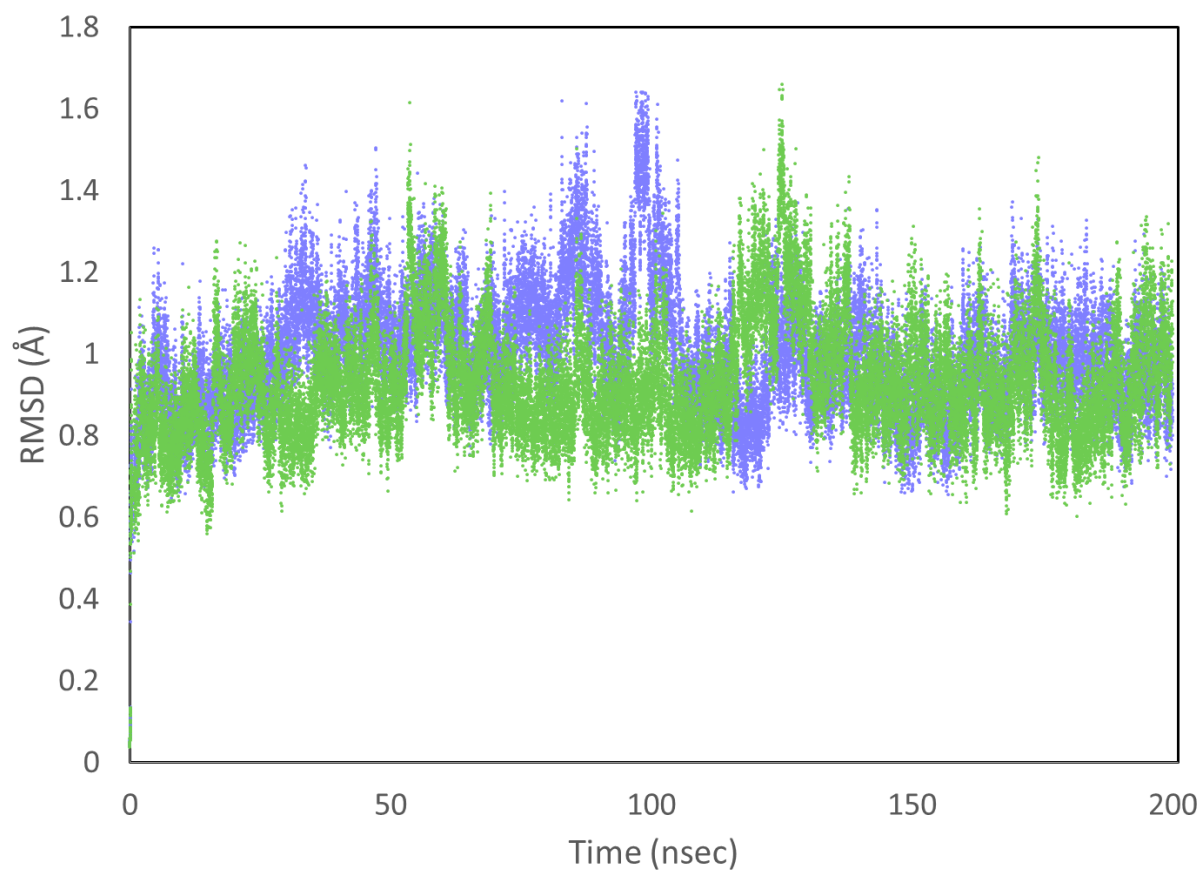

Supplement: AAC.01277-16_zac010165584so1.pdf [file AAC.01277-16_zac010165584so1.pdf]
